# Supplementary material for: Copper(i) mediated oligomerisation of a phosphaalkyne
Source: Royal Society of Chemistry journal article supplement (doi:10.1039/b712161j), 2007-01-01
Supplement: b712161j.pdf [file b712161j.pdf]

## **Supporting Information for:**

# **Copper(I) Mediated Oligomerisation of a Phosphaalkyne**

Ulf Vogel<sup>a</sup> John F. Nixon<sup>b</sup> and Manfred Scheer<sup>a</sup>

<sup>a</sup> Universität Regensburg, Institut für Anorganische Chemie, 93040 Regensburg, Germany.

<sup>b</sup> Chemistry Department, School of Life Sciences, University of Sussex, Falmer, Brighton,  
BN19QJ, U.K.

**S1. Removal of the CuI matrix from 2**

**S2. <sup>31</sup>P-NMR spectrum of the resulting mixture**

### **S1. Removal of the CuI from 2**

A solution of NaCN (800 mg, 16.3 mmol) in 20 ml H<sub>2</sub>O was layered with 7 ml Et<sub>2</sub>O and the mixture was thoroughly degassed by bubbling dinitrogen through it for 30 minutes. Solid **2**·x CH<sub>3</sub>CN (100 mg, 0.1 mmol) was added and the mixture was vigorously stirred for 5 hours. After that time all the solid was dissolved and the Et<sub>2</sub>O phase showed a pale yellow colour. Separation of the organic phase and removal of all volatiles yielded a yellow, oily residue (ca. 30 mg, 70 % based on C<sub>20</sub>H<sub>27</sub>P<sub>5</sub>) from which <sup>31</sup>P{<sup>1</sup>H}-NMR data was recorded in C<sub>6</sub>D<sub>6</sub> (see S2). On storage of the mixture at -30 °C for one month a few crystals of **6** were obtained, which were suitable for X-Ray crystallography (see S3). Yield: 30 mg (73%)

## S2. $^{31}\text{P}$ -NMR spectrum of the resulting mixture

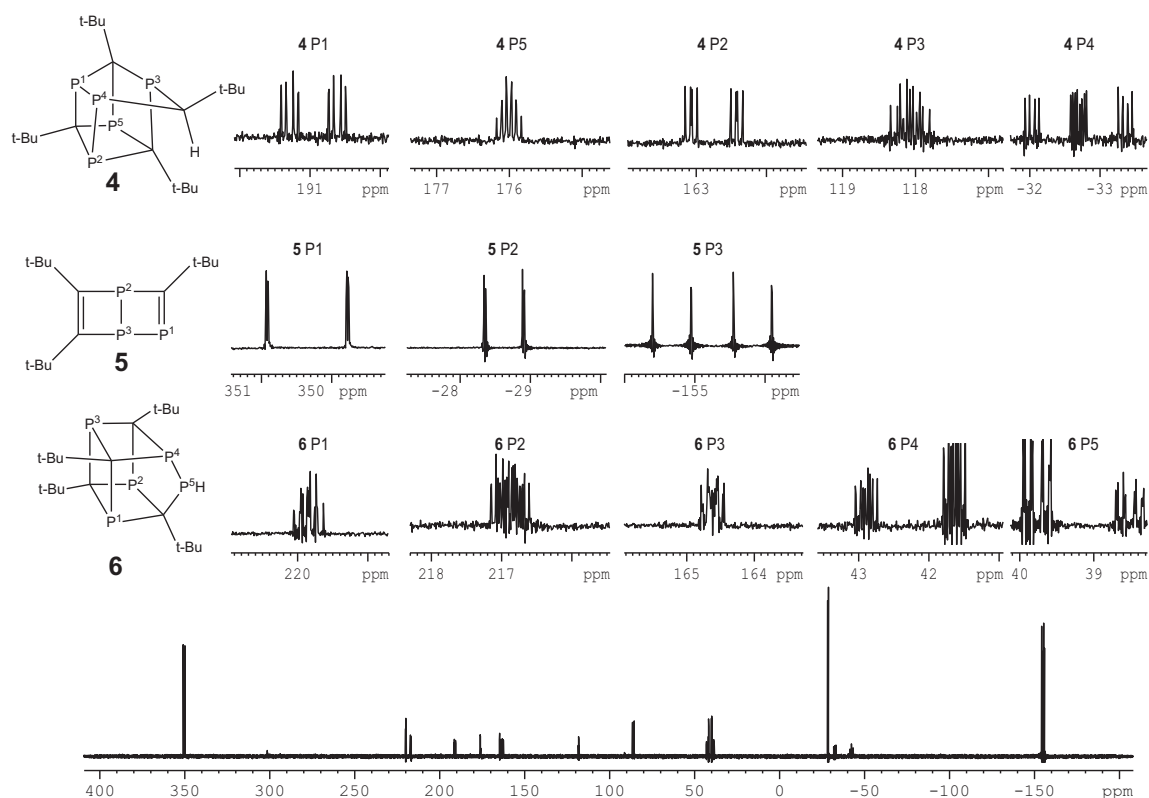

**Fig. 1:**  $^{31}\text{P}\{^1\text{H}\}$ -NMR data (161 MHz;  $\text{C}_6\text{D}_6$ ;  $\text{H}_3\text{PO}_4$ ) and assignment for the identified products

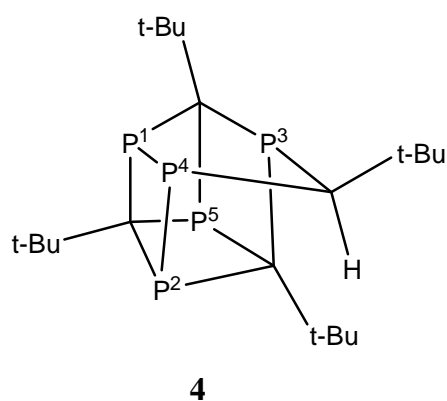

$\delta_{\text{P}}$  190.9 (1P, ddd,  $^1J(\text{P}^1, \text{P}^4) = 109.8$  Hz,  $^2J(\text{P}^1, \text{P}^3) = 27.7$  Hz,  $^2J(\text{P}^1, \text{P}^2) = 11.9$  Hz, P<sup>1</sup>), 176.0 (1 P, dd,  $^2J(\text{P}^5, \text{P}^3) = 21.2$  Hz,  $^2J(\text{P}^5, \text{P}^4) = 10.8$  Hz, P<sup>5</sup>), 162.7 (1 P, ddd,  $^1J(\text{P}^2, \text{P}^4) = 105.3$  Hz,  $^2J(\text{P}^2, \text{P}^3) = 15.2$  Hz,  $^2J(\text{P}^2, \text{P}^1) = 11.9$  Hz, P<sup>2</sup>), 118.1 (1 P, dddd,  $^2J(\text{P}^3, \text{P}^1) = 27.7$  Hz,  $^2J(\text{P}^3, \text{P}^4) = 22.2$  Hz,  $^2J(\text{P}^3, \text{P}^5) = 21.2$  Hz,  $^2J(\text{P}^3, \text{P}^2) = 15.3$  Hz, P<sup>3</sup>), -32.7 (1 P, dddd,  $^1J(\text{P}^4, \text{P}^1) = 109.8$  Hz,  $^1J(\text{P}^4, \text{P}^2) = 105.3$  Hz,  $^2J(\text{P}^4, \text{P}^3) = 22.2$  Hz,  $^2J(\text{P}^4, \text{P}^5) = 10.8$  Hz, P<sup>4</sup>).

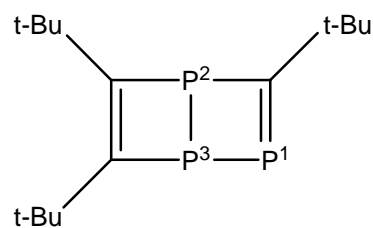

5

$\delta_{\text{P}}$  350.8 (1P, dd,  $^1J(\text{P}^1, \text{P}^3) = 186.2$  Hz,  $J(\text{P}^1, \text{P}^2) = 3.4$  Hz,  $\text{P}^1$ ),  $-28.6$  (1 P, dd,  $J(\text{P}^2, \text{P}^3) = 89.7$  Hz,  $J(\text{P}^2, \text{P}^1) = 3.4$  Hz,  $\text{P}^2$ ),  $-155.3$  (1 P, dd,  $^1J(\text{P}^3, \text{P}^1) = 186.2$  Hz,  $J(\text{P}^3, \text{P}^2) = 89.7$  Hz,  $\text{P}^3$ ).

See also: P. Binger, S. Leininger, K. Gather and U. Bergsträßer, *Chem. Ber.*, 1997, **130**, 1491.

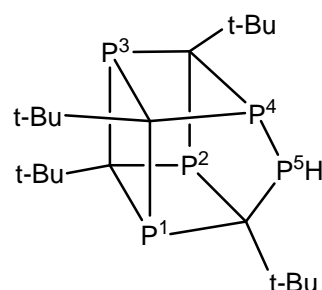

6

$\delta_{\text{P}}$  219.8 (1P, dddd,  $^1J(\text{P}^1, \text{P}^2) = 20.8$  Hz,  $^2J(\text{P}^1, \text{P}^4) = 17.1$  Hz,  $^2J(\text{P}^1, \text{P}^5) = 16.3$  Hz,  $^2J(\text{P}^1, \text{P}^3) = 13.9$  Hz,  $\text{P}^1$ ), 216.9 (1 P, dddd,  $^2J(\text{P}^2, \text{P}^5) = 41.4$  Hz,  $^2J(\text{P}^2, \text{P}^1) = 20.8$  Hz,  $^2J(\text{P}^2, \text{P}^3) = 15.5$  Hz,  $^2J(\text{P}^2, \text{P}^4) = 9.9$  Hz,  $\text{P}^2$ ), 164.6 (1 P, dddd,  $^2J(\text{P}^3, \text{P}^4) = 22.4$  Hz,  $^2J(\text{P}^3, \text{P}^2) = 15.4$  Hz,  $^2J(\text{P}^3, \text{P}^1) = 13.9$  Hz,  $^2J(\text{P}^3, \text{P}^5) = 2.7$  Hz,  $\text{P}^3$ ), 42.1 (1 P, dddd,  $^1J(\text{P}^4, \text{P}^5) = 202.9$  Hz,  $^2J(\text{P}^4, \text{P}^3) = 22.4$  Hz,  $^2J(\text{P}^4, \text{P}^1) = 17.1$  Hz,  $^2J(\text{P}^4, \text{P}^2) = 9.9$  Hz,  $\text{P}^4$ ), 39.3 (1 P, dddd,  $^1J(\text{P}^5, \text{P}^4) = 202.9$  Hz,  $^2J(\text{P}^5, \text{P}^2) = 41.4$  Hz,  $^2J(\text{P}^5, \text{P}^1) = 16.3$  Hz,  $^2J(\text{P}^5, \text{P}^3) = 2.7$  Hz,  $\text{P}^5$ ).  
 The signal for  $\text{P}^5$  splits into a doublet when measured without  $^1\text{H}$ -decoupling ( $^1J(\text{P}^5, \text{H}) = 177.0$  Hz)
